# Supplementary material for: Synergic association of diabetes mellitus and chronic kidney disease with muscle loss and cachexia: results of a 16-year longitudinal follow-up of a community-based prospective cohort study
Source: Aging (Albany NY). 2021 Sep 16;13(18):21941–61. doi: 10.18632/aging.203539 (PMC8507303; doi:10.18632/aging.203539)
Supplement: Supplementary Figures [file aging-13-203539-s001.pdf]

SUPPLEMENTARY FIGURES

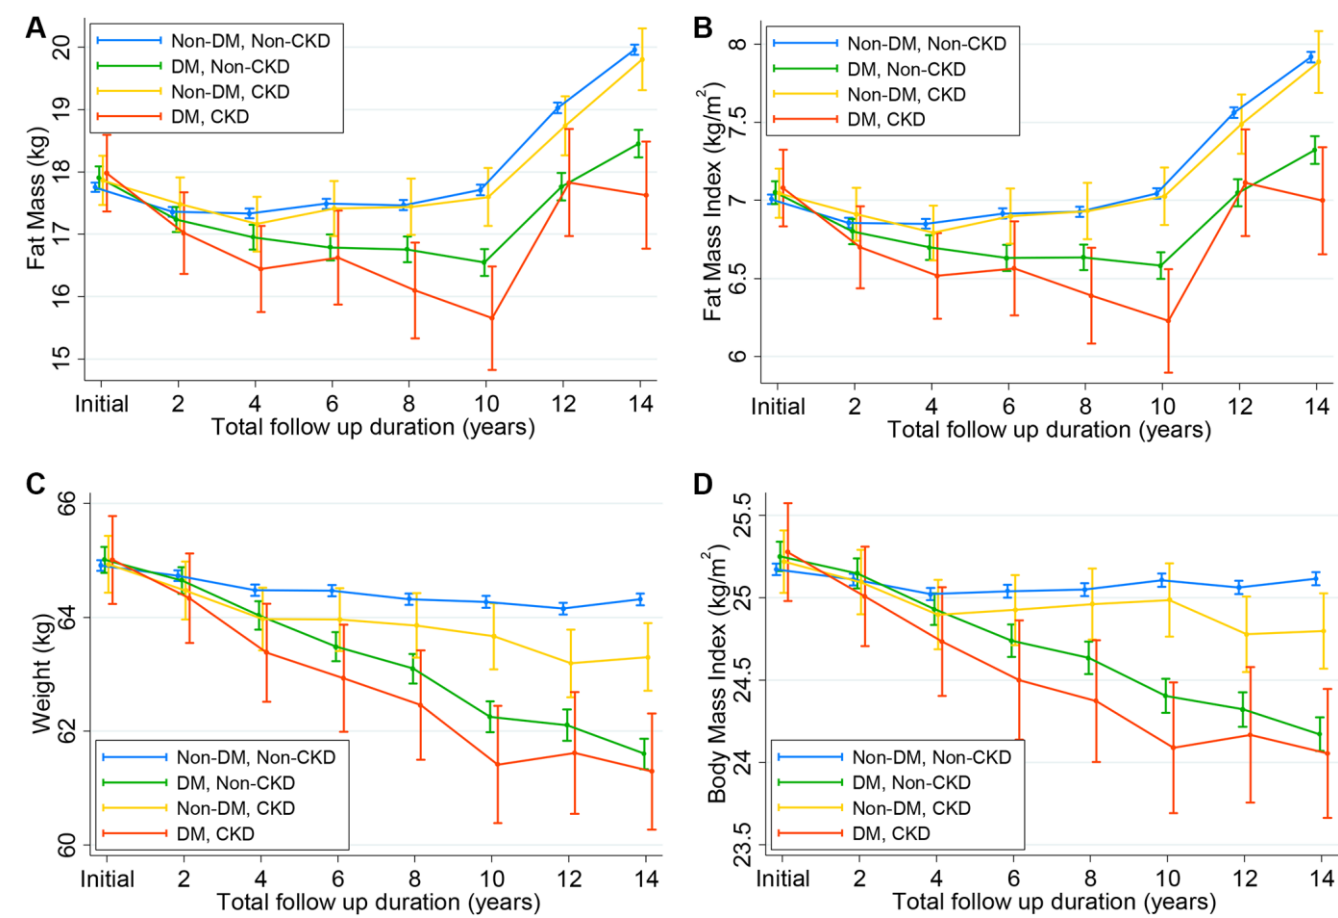

**Supplementary Figure 1.** Changes in (A) Fat mass, (B) Fat mass index, (C) Body weight, and (D) BMI over time according to 4 groups by diabetes mellitus and chronic kidney disease.

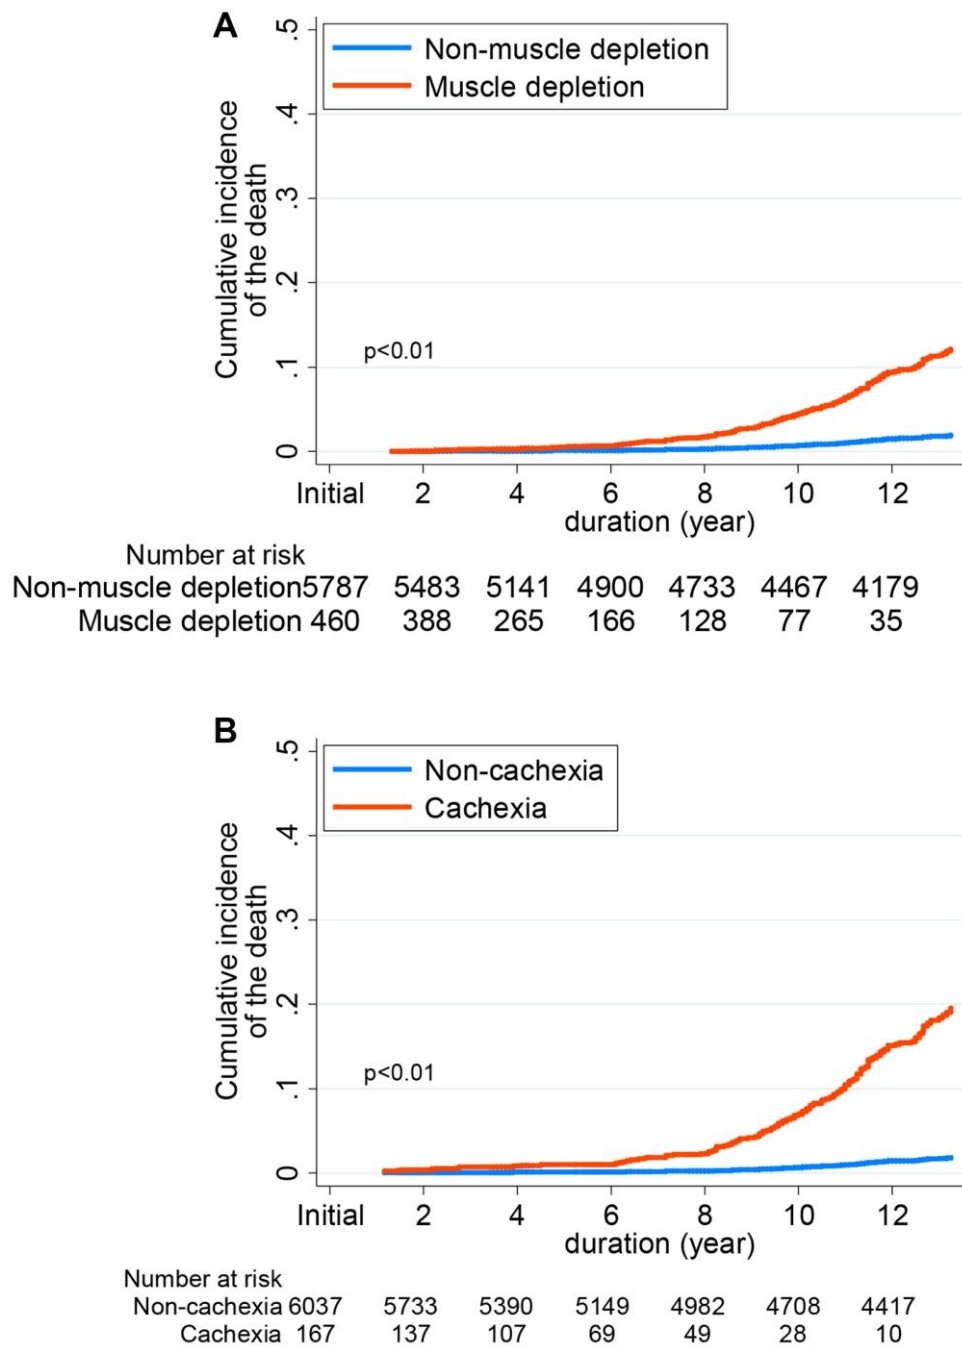

**Supplementary Figure 2.** Cumulative incidence function for development of all-cause mortality according to (A) incident muscle depletion and (B) cachexia.

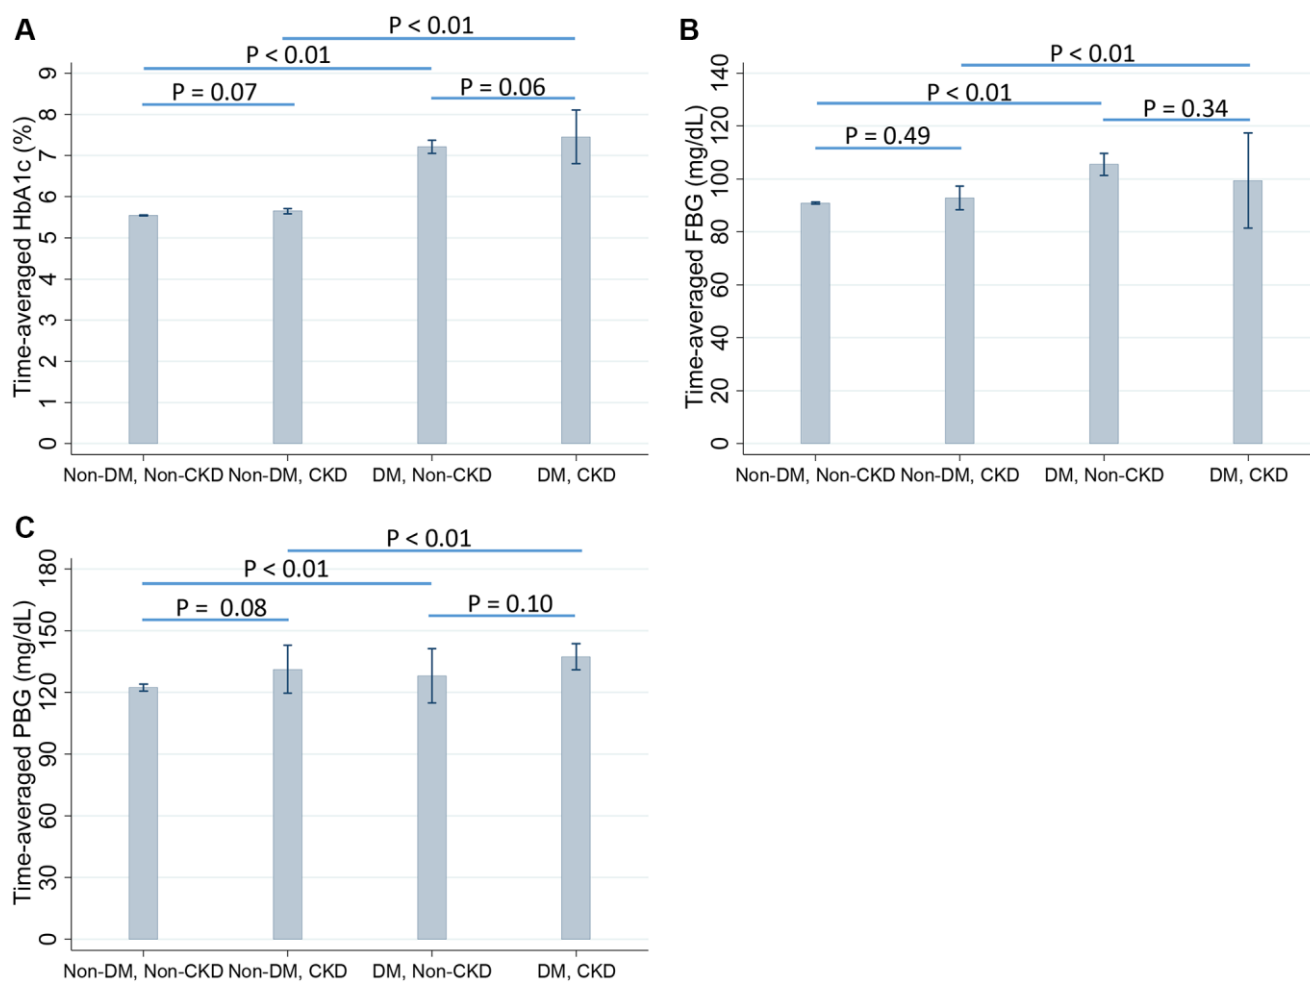

**Supplementary Figure 3.** Glycemic control during follow-up: (A) HbA1c; (B) fasting glucose; and (C) 2-h postprandial blood glucose.
